# Supplementary material
Source: PubMed Central journal article supplement (PMC1200280)
Supplement: pnas_0504604102_5.pdf [file pnas_0504604102_5.pdf]

**Table 1. Promoter sequencing**

Promoters were sequenced using primers:

PL\_Left\_seq:AGATCCTTGGCGGCAAGAAA and

PL\_Right\_seq:GCCATGGAACAGGTAGTTTTCCAG

| Promoter name | Promoter sequence                                                                                                                                                                           | Promoter strength | Relative mRNA | Chloramphenicol minimum inhibitory concentration (µg/ml) | Average promoter metric |
|---------------|---------------------------------------------------------------------------------------------------------------------------------------------------------------------------------------------|-------------------|---------------|----------------------------------------------------------|-------------------------|
| AA            | CAATTCGACGTCTAAGAAACCATTA<br>TTATTATGACATTAACCTATAAAAAAT<br>AGGCGTATCACGAGGCCCTTCCGTCT<br>TCACCTCGAGTCCCTATCAGTGATAG<br>AGATTGACATCCCTATCAGTGATAGA<br>AATACTGAGCACATCAGCAGGACGC<br>ACTGACC  | 40,942.21         | 0.236732      | 225                                                      | 0.218905                |
| B             | CAATTCGACGTCTAAGAAGCCATTA<br>TTATCATGACATTAACCTATAAAAGT<br>AGGCGTGTACAAGGCCCTTTCGTCT<br>TCACCTCGAGTCCCTATCAGCGATAG<br>AGATTGACATCCCTATCAGTGACCGA<br>GATACTGAGCACATCAGCAGGACGC<br>ACTGACC    | 143,258.01        | 0.906126      | 372                                                      | 0.815062                |
| BB            | CAATTCGACGTCTAAGAGACCATTA<br>TTATCGTGACATTAACCTATAAAGAC<br>AGGCGTGTACGAGGCCCTTTCGTCT<br>TCACCTCGAGTCCCTATCAGTGACAG<br>AGATTGACACCCCTATCAGTGATAG<br>AGATACTGAGCACATCAGCAGGACG<br>CACTGACC    | 85,320.056        | 0.407102      | 338                                                      | 0.417495                |
| E             | CAATTCGACGCCTAAGAAACCATT<br>ATTATCATGACATTAGCCTATAAAAAA<br>TAGGCGTACCACGAGGCCCTTTCGTCT<br>TTCACCTCGAGTCCCTATCAGTGATA<br>GAGATTGACACCCCTATCAGTGATA<br>GAGATACTGAGCACATCAGCAGGAC<br>GCACTGACC | 183,693.69        | 0.743061      | 375                                                      | 0.83686                 |
| F             | CAATTCGACGTCTAAGAAACCATTG<br>TTATCGTGACATTAACCTATAANANT<br>AGGCGTATCACGAGGCCCTTTCGCCT<br>TCACCTCGAGTCCCTATCAGYGATAG<br>AGACCGACACCCCTATCAGTGATAG<br>GGATACTGGGCACATCAGCAGGACG<br>CACTGACC   | 194,748.86        | 0.686715      | 372                                                      | 0.836938                |
| II            | CAATCCGACGTCTAAGAAACCATTAT<br>TATCATGACATTAACCTATAAAAAATA<br>GGCGTATCACGAGGCCCTTTCGTCTT<br>CACCTCGAGTCCCTATCAGTGATAGA<br>GATGGACATCCCTATCAGTGATAGA<br>GATACTGAGCACATCAGCAGGACGC<br>ACTGACC  | 5,781.5417        | 0.063856      | 34                                                       | 0.042617                |
| JJ            | CAATTCGACGTCTAAGAAACCATTA<br>TTATCATGACATTAACCTATAAAAAAT<br>AGGCGTATCACGAGGCCCTTTCGTCT<br>TCACCTCGAGTCCCTATCAGTGATAG<br>AGATTGACCTCCCTATCAGTGATAGA<br>GATACTGAGCACATCAGCAGGACGC<br>ACTGACC  | 18,896.294        | 0.159416      | 68                                                       | 0.123911                |
| K             | CAATTCGACGTCTAAGAAACCATTA<br>TTATCATGACATTAACCTATAAAAAAT<br>AGGCGTATCACGAGGCCCTTTCGTCT<br>TCACCTCGAGTCCCTATCAGTGATAG<br>GGATTGACATCCCTATCAGTGATAGA                                          | 50,376.463        | 0.29891       | 282                                                      | 0.274103                |

|                                |                                                                                                                                                                                             |            |          |     |          |
|--------------------------------|---------------------------------------------------------------------------------------------------------------------------------------------------------------------------------------------|------------|----------|-----|----------|
|                                | GACACTGGGCACATCAGCAGGACGC<br>ACTGACC                                                                                                                                                        |            |          |     |          |
| L                              | CAATTCCGACGTCTAAGAAACCATTG<br>TTATCATGACATTAACCTATAAAAAAT<br>AGGCGTATCACGAGGCCCTTTCGTCT<br>TCACCTCGAGTCCCTATCAGTGATAG<br>AGATTGACACCCCTATCAGTGACAG<br>AGATACTGAGCACATCAGCAGGACG<br>CACTGACC | 129,869.65 | 0.757858 | 338 | 0.706716 |
| N                              | CAATTCCGACGTCTAAGAAACCATTA<br>TTATCATGACATTAACCTATAAAAAAT<br>AGGCGTATCACGAGGCCCTTTCGTCT<br>TCACCTCGAGTCCCTATCAGTGATAG<br>AGATTGACACCCCTATCAGTGCTAGA<br>GATACTGAGCACATCAGCAGGACGC<br>ACTGACC | 90,494.778 | 0.366629 | 372 | 0.410482 |
| OO                             | CAATTCCGACGTCTAAGAAACCATT<br>ATCATGACATCAACCTATAAAAAATA<br>GGCGTATCACGAGGCCCTCTCGTCTC<br>CACCTCAAGCTCCCTATCTAGTGATA<br>GCGATTGACATCCCTATCAGTGACGG<br>AGATATTGAGCACATCAGCAGGACG<br>CACTGACC  | 996.99754  | 0.003075 | 17  | 0        |
| P                              | CAATTCCGACGTCTAGGAAACCGTTA<br>TATCATGACGCCGACCTATAAAGAT<br>AGGCGGTCNCGAGGCCCTTCCGCCT<br>TCACCTCGNGCTCCCTATCAGTAATA<br>GAGATTGACACCCCTGTCAGTGATA<br>GGGATACTGAGCACATCAGCAGGAC<br>GCACTGACC   | 160,631.4  | 0.575729 | 425 | 0.69426  |
| P <sub>L<sup>Tet</sup>O1</sub> | CAATTCCGACGTCTAAGAAACCATT<br>ATTATCATGACATTAACCTATAAAAA<br>TAGGCGTATCACGAGGCCCTTTCGTCT<br>TTCACCTCGAGTCCCTATCAGTGATA<br>GAGATTGACATCCCTATCAGTGATAG<br>AGATACTGAGCACATCAGCAGGACG<br>CACTGACC | 145,806.85 | 1        | 338 | 0.868513 |
| Q                              | CAATTCCGACGTCTAAGAAACCATTA<br>TTATCATGACATTAACCTATAAAAAAT<br>AGGCGTATCACGAGGCCCTTTCGTCT<br>TCACCTCGAGTCCCTATCAGTGATAG<br>AGATTGACATCCCTATCAGTGATAGG<br>GATACTGAGCACATCAGCAGGACGC<br>ACTGACC | 195,662.5  | 0.736003 | 450 | 0.863916 |
| R                              | CAATTCCGACGTCTGAGAAGCCATTA<br>TTATCATGACATTAACCTATAAAAAAT<br>AGGCGTATCACGAGGCCCTTTCGTCT<br>TCACCTCAAGCCCCTATCAGTGATAG<br>AGATTGACATCCCTATCAGTGATAGA<br>GACACTGAGCACATCAGCAGGACGC<br>ACTGACC | 32,141.611 | 0.126381 | 225 | 0.141241 |
| S                              | CAATTCCGACGTCTAAGAAACCATTA<br>TTATCATGACATTAACCTATAAAAAAT<br>AGGCGTATCACGAGGCCCTTTCGTCT<br>TCACCTCGAGTCCCTATCAGTGATAG<br>AGATTGACATCCCTATCAGTGATAGA<br>GACACTGAGCACATCAGCAGGACGC<br>ACTGACC | 41,376.671 | 0.393587 | 282 | 0.298443 |
| T                              | CAATTCCGACGTCTAAGAAGCCATTA<br>CTATCATGACATTAACCTATAGGAAT<br>AGGCGTATCACGGGGCCCTTCCGCCT<br>TCACCTCGGATCCCTGTCAGTGCTAG<br>AGATTGACATCCCTACCGGTGATAA<br>AGATACTGAGCACATCAGCAGGACG<br>CACTGACC  | 63,080.517 | 0.333052 | 338 | 0.323638 |

|   |                                                                                                                                                                                              |            |          |     |          |
|---|----------------------------------------------------------------------------------------------------------------------------------------------------------------------------------------------|------------|----------|-----|----------|
| U | CAATTCCGACGTCTAAGAAACCATTA<br>TTATCATGACACTAACCTATAAAAAAT<br>AGGCGCATCACGAGGCCCTTTCGTCT<br>CCACCTCAAGCTCCCTATCAGTGATA<br>GAGATTGACATCCCCGCCGGTGATA<br>GAGACACTGAGCACATCAGCAGGAC<br>GCACTGACC | 43,264.021 | 0.376762 | 282 | 0.294854 |
| V | CAATTCCGACGTCTGAGAGGCCATTA<br>TTATCGTGGCATTGGCCTATAAAGGC<br>AGGCGTGTACAGAGACCCTCTCGTCT<br>CCGCCTCGGGTCCCTATCAATGGTAG<br>AGATTGACATCCCCATCAGTGGTGG<br>AGATACTGAGCACATCAGCAGGACG<br>CACTGACC   | 161,088.47 | 0.574349 | 450 | 0.694738 |
| W | CAATTCCGACGTCTAAGAAACCATTA<br>TTATCATGACATTAACCTATAAAAAAT<br>AGGCGTATCACGAGGCCCTTTCGTCT<br>TCACCTCGAGTCCCTATCAGTGATAG<br>AGATTGACATCCCTATCAGTGATAGA<br>GATACTGAGCACATCAGCAGGACGC<br>ACTGACC  | 109,462.28 | 0.525424 | 450 | 0.538349 |
| Y | CAATTCCGACGTCTAAGAAACCATTA<br>TTATCATGACATTAACCTATAAAAAAT<br>AGGCGTATCACGAGGCCCTTTCGTCT<br>TCACCTCGAGTCCCTATCAGTGATAG<br>GGATTGACATCCCTATCAGTGATAGA<br>GACTGAGCACATCAGCAGGACGC<br>ACTGACC    | 70,234.541 | 0.273757 | 338 | 0.312272 |
| Z | CAATTCCGACGTCTAAGAAACCATTA<br>TTATCATGACATTAGCCTATAAAAAAT<br>AGGCGTATCACGAGGCCCTTTCGCCT<br>TCACCTCGAGTCCCTATCGGTGACAG<br>AGGTTGACATCCCTATCGGTGATAGA<br>GATACTGAGCACATCAGCAGGACGC<br>ACTGACC  | 146,023.14 | 0.75968  | 450 | 0.748905 |
