# Supplementary material
Source: PubMed Central journal article supplement (PMC1200280)

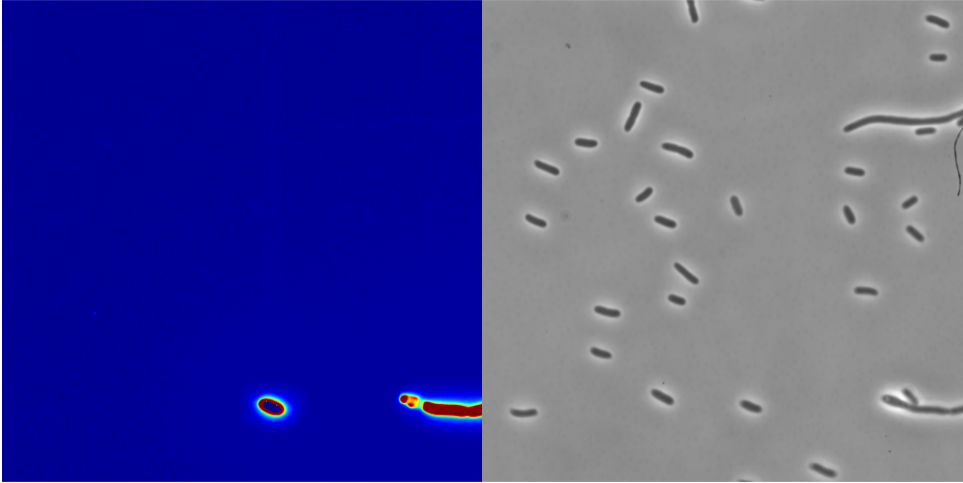

Supplement: pnas_0504604102_2.pdf [file pnas_0504604102_2.pdf]
